# Supplementary material for: Incorporating leys in arable systems as a mitigation strategy to reduce soil organic carbon losses during land-use change
Source: Frontiers journal article supplement (doi:10.3389/fenvs.2024.1399197), 2024-05-14
Supplement: Image_1.pdf [file Image_1.pdf]

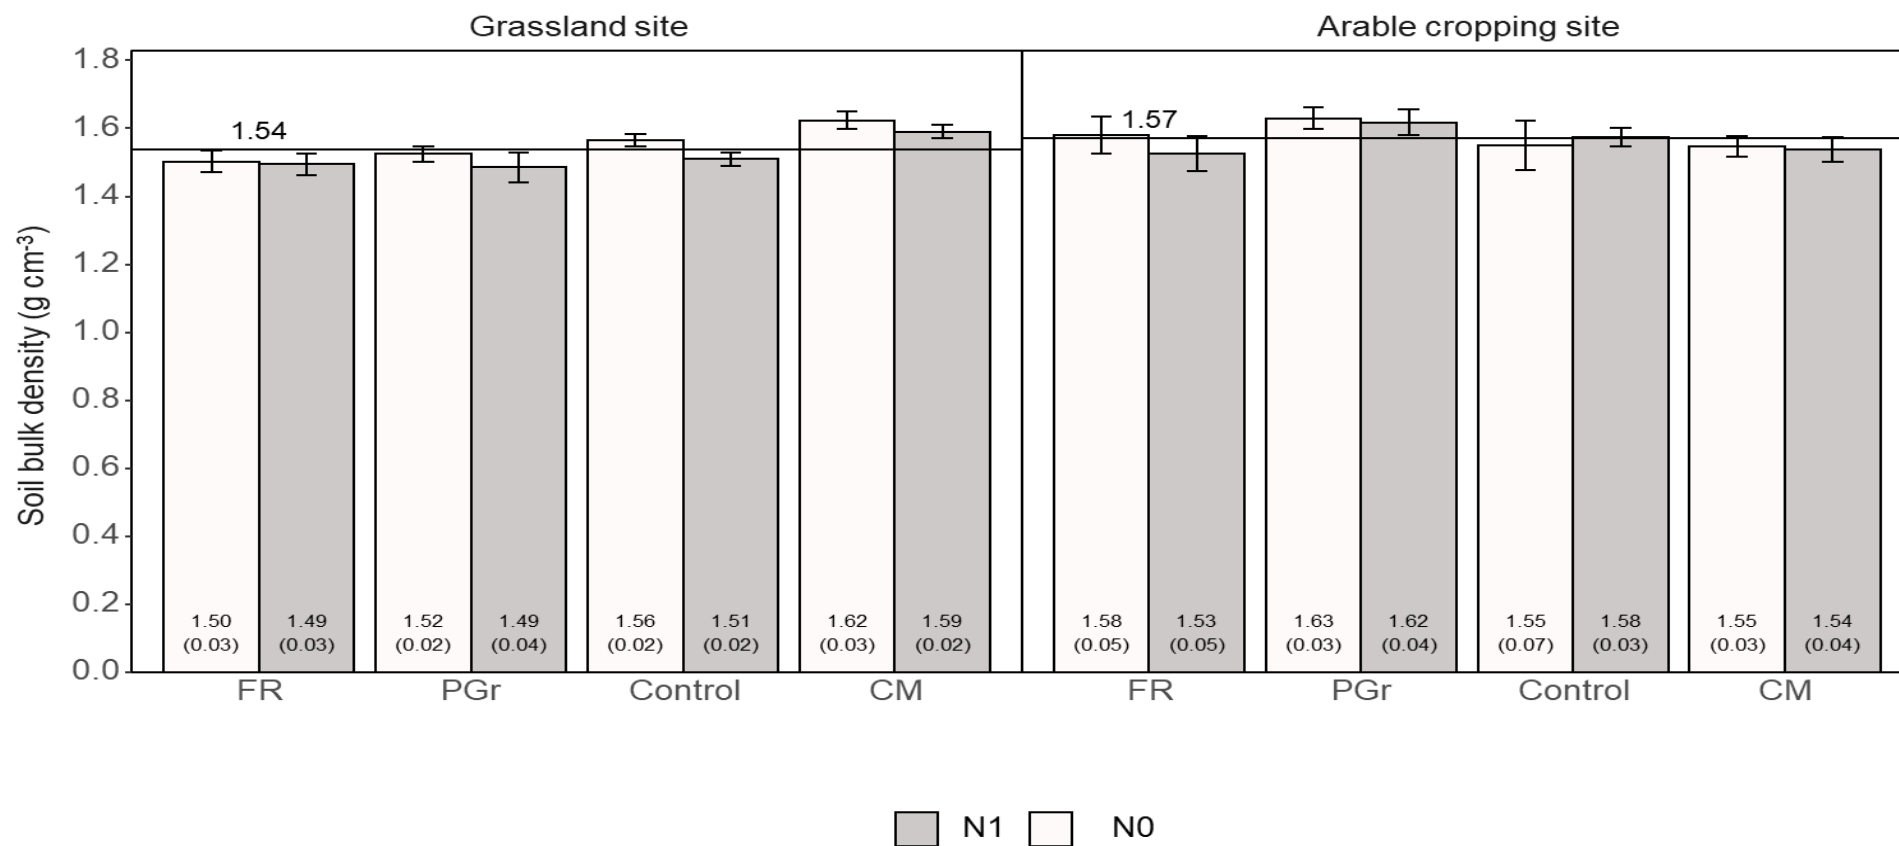

**Figure S1: Average soil bulk density of the different treatments. Renovated/new permanent grassland (PGr) for the grassland and arable site, respectively, forage rotation (FR), and continuous silage maize (CM); N rates were 0 (N0) and 240 kg N ha<sup>-1</sup> (N1) applied as slurry.**
